# Supplementary material for: Causes of brain dysfunction in acute coma: a cohort study of 1027 patients in the emergency department
Source: Springer Nature journal article supplement (doi:10.1186/s13049-019-0669-4), 2019-11-07
Supplement: MOESM1 [file 17362346]

| diagnosis                  | [n] patients with main diagnosis<br>[n] of whom had multiple pathologies |     | [n] coincidences with accessory pathologies |                    |                     |                   |                           |            |                        |                                |              |              |        | [n] main diagnosis + [n] accessory path. |             |                       |                      |                                |                                 |                               |                            |     |
|----------------------------|--------------------------------------------------------------------------|-----|---------------------------------------------|--------------------|---------------------|-------------------|---------------------------|------------|------------------------|--------------------------------|--------------|--------------|--------|------------------------------------------|-------------|-----------------------|----------------------|--------------------------------|---------------------------------|-------------------------------|----------------------------|-----|
|                            |                                                                          |     | II                                          |                    | III                 |                   |                           |            |                        |                                |              |              |        |                                          |             |                       |                      |                                |                                 |                               |                            |     |
|                            |                                                                          |     | epileptic state                             | epileptic seizures | cardiogenic syncope | cardiogenic shock | respiratory insufficiency | exsiccosis | hepatic encephalopathy | hyperosmolar/ketoacidotic coma | hypoglycemia | hyponatremia | uremia |                                          | hypothermia | septic encephalopathy | alcohol intoxication | opiate/opioid (+ other) intox. | benzodiazepine (+ other) intox. | psychiatric medication intox. | aortic dissection/bleeding |     |
| intracranial hemorrhage    | sub-tentorial                                                            | 21  | 6                                           | 1                  | 3                   |                   |                           | 3          | 1                      |                                |              |              |        |                                          |             |                       |                      |                                |                                 |                               | 21                         |     |
|                            | primarily intraventricular                                               | 2   | 1                                           |                    |                     |                   |                           |            |                        |                                |              |              |        |                                          |             |                       |                      |                                |                                 |                               |                            | 2   |
|                            | supra-tentorial, intracerebral                                           | 80  | 15                                          | 1                  | 9                   |                   |                           | 5          | 1                      |                                |              |              |        |                                          |             |                       |                      |                                |                                 |                               |                            | 80  |
|                            | supra-tentorial, subarachnoid                                            | 26  | 10                                          |                    | 4                   | 1                 | 1                         | 4          |                        |                                |              |              |        |                                          | 1           |                       |                      |                                |                                 |                               |                            | 26  |
|                            | supra-tentorial, subdural                                                | 31  | 12                                          | 5                  | 3                   |                   |                           | 3          |                        | 1                              |              |              |        |                                          | 4           |                       |                      |                                |                                 |                               |                            | 31  |
|                            | supra-tentorial, combined                                                | 30  | 11                                          | 2                  | 4                   |                   |                           | 2          |                        |                                | 2            | 1            |        |                                          | 1           |                       |                      |                                |                                 |                               |                            | 30  |
| I infarction               | basilar artery occlusion                                                 | 26  | 3                                           |                    |                     |                   |                           | 2          | 1                      |                                |              |              |        |                                          |             |                       |                      |                                |                                 |                               |                            | 26  |
|                            | sub-tentorial, cerebellar                                                | 5   | 2                                           |                    |                     |                   |                           |            | 1                      |                                |              |              |        | 1                                        |             | 1                     |                      |                                |                                 |                               |                            | 5   |
|                            | supra-tentorial, (bi-)thalamic                                           | 6   | 0                                           |                    |                     |                   |                           |            |                        |                                |              |              |        |                                          |             |                       |                      |                                |                                 |                               |                            | 6   |
|                            | supra-tentorial, middle cerebral artery                                  | 58  | 29                                          | 5                  | 10                  |                   |                           | 1          | 5                      | 11                             |              |              |        | 1                                        | 4           |                       |                      |                                |                                 | 1                             |                            | 58  |
| venous occlusion           | sinus thrombosis                                                         | 1   | 1                                           |                    |                     |                   |                           | 1          |                        |                                |              |              |        |                                          |             |                       |                      |                                |                                 |                               |                            | 1   |
| PRES                       | PRES                                                                     | 5   | 4                                           | 3                  | 1                   |                   |                           |            |                        |                                |              |              |        |                                          |             |                       |                      |                                |                                 |                               |                            | 5   |
| inflammation               | meningo-encephalitis                                                     | 15  | 9                                           |                    | 3                   |                   |                           | 3          | 5                      |                                |              |              | 2      | 5                                        |             |                       |                      |                                |                                 |                               |                            | 15  |
|                            | aseptic encephalitis                                                     | 7   | 2                                           |                    | 2                   |                   |                           |            |                        |                                |              |              |        | 1                                        |             |                       |                      |                                |                                 |                               |                            | 7   |
| tumor                      | focal edema/occlusive hydrocephalus                                      | 5   | 3                                           | 2                  | 1                   |                   |                           | 1          |                        |                                |              |              |        |                                          |             |                       |                      |                                |                                 |                               |                            | 5   |
|                            | first diagnosis of solid tumor                                           | 12  | 10                                          | 7                  | 3                   |                   |                           | 1          |                        |                                |              |              |        |                                          |             |                       |                      |                                |                                 |                               |                            | 12  |
| II epilepsy                | epileptic state                                                          | 94  | 28                                          |                    |                     |                   |                           | 1          | 22                     | 5                              |              |              | 1      | 5                                        | 1           |                       |                      |                                |                                 |                               |                            | 123 |
|                            | epileptic seizures                                                       | 94  | 20                                          |                    |                     |                   |                           | 2          | 12                     | 8                              |              |              | 1      | 3                                        | 2           | 1                     |                      |                                |                                 |                               |                            | 163 |
| neuro-degenerative disease | LOC in neuro-degenerative disease                                        | 2   | 0                                           |                    |                     |                   |                           |            |                        |                                |              |              |        |                                          |             |                       |                      |                                |                                 |                               |                            | 2   |
|                            | akinetic crisis (pseudocoma)                                             | 2   | 1                                           |                    |                     |                   |                           | 1          |                        |                                |              |              |        |                                          |             |                       |                      |                                |                                 |                               |                            | 2   |
| psychiatric disease        | dissociative state (pseudocoma)                                          | 21  | 0                                           |                    |                     |                   |                           |            |                        |                                |              |              |        |                                          |             |                       |                      |                                |                                 |                               |                            | 21  |
| syncope                    | non-cardiogenic syncope                                                  | 2   | 0                                           |                    |                     |                   |                           |            |                        |                                |              |              |        |                                          |             |                       |                      |                                |                                 |                               |                            | 2   |
|                            | cardiogenic syncope                                                      | 8   | 2                                           |                    |                     |                   |                           |            |                        | 1                              |              |              |        | 1                                        | 2           |                       |                      |                                |                                 |                               |                            | 9   |
| cardiac/pulmonary          | cardiogenic shock                                                        | 10  | 0                                           |                    |                     |                   |                           |            |                        |                                |              |              |        |                                          |             |                       |                      |                                |                                 |                               |                            | 22  |
|                            | respiratory insufficiency                                                | 35  | 12                                          |                    |                     |                   |                           | 3          | 9                      | 1                              | 1            | 1            | 1      | 7                                        |             |                       |                      |                                |                                 |                               |                            | 144 |
| III metabolic/homoeostatic | exsiccosis                                                               | 10  | 1                                           |                    |                     |                   |                           |            |                        |                                |              |              | 1      | 1                                        |             |                       |                      |                                |                                 |                               |                            | 98  |
|                            | hemorrhagic shock (GI bleeding)                                          | 1   | 1                                           |                    |                     |                   |                           |            |                        |                                |              | 1            |        |                                          |             |                       |                      |                                |                                 |                               |                            | 1   |
|                            | hepatic encephalopathy                                                   | 9   | 6                                           | 1                  |                     |                   |                           | 3          | 2                      |                                |              |              | 1      | 1                                        |             |                       |                      |                                |                                 |                               |                            | 14  |
|                            | hyperosmolar/ketoacidotic coma                                           | 6   | 6                                           | 2                  |                     |                   |                           | 1          | 6                      |                                |              |              | 3      | 3                                        | 3           |                       |                      |                                |                                 |                               |                            | 7   |
|                            | hypoglycemia                                                             | 10  | 6                                           | 3                  |                     |                   |                           | 3          | 3                      | 1                              |              |              | 1      | 1                                        |             |                       |                      |                                |                                 |                               |                            | 11  |
|                            | hyponatremia                                                             | 10  | 9                                           | 1                  | 8                   |                   |                           | 1          |                        |                                |              |              |        |                                          |             |                       |                      |                                |                                 |                               |                            | 15  |
| uremia                     | uremia                                                                   | 4   | 2                                           | 1                  | 1                   |                   |                           |            |                        | 2                              |              |              |        | 2                                        |             |                       |                      |                                |                                 |                               |                            | 21  |
|                            | hypothermia                                                              | 0   | 0                                           |                    |                     |                   |                           |            |                        |                                |              |              |        |                                          |             |                       |                      |                                |                                 |                               |                            | 11  |
| septicemia                 | septic encephalopathy                                                    | 25  | 25                                          | 1                  | 1                   |                   |                           | 1          | 9                      | 25                             | 2            |              | 6      | 3                                        |             |                       |                      | 1                              | 1                               |                               |                            | 62  |
|                            | alcohol only                                                             | 79  | 12                                          |                    | 1                   |                   |                           |            | 10                     | 1                              |              |              |        |                                          |             |                       |                      |                                |                                 |                               |                            | 90  |
| intoxication               | opiates/opioids (+ other)                                                | 34  | 17                                          |                    | 2                   |                   |                           |            | 12                     | 3                              |              |              |        |                                          |             |                       |                      |                                |                                 |                               |                            | 36  |
|                            | benzodiazepines (+ other)                                                | 17  | 4                                           |                    | 1                   |                   |                           |            | 2                      |                                |              |              |        | 2                                        |             |                       |                      |                                |                                 |                               |                            | 18  |
|                            | psychiatric medication                                                   | 13  | 4                                           |                    | 1                   |                   |                           | 2          | 1                      | 1                              |              |              |        |                                          | 2           |                       |                      |                                |                                 |                               |                            | 14  |
|                            | other substances                                                         | 22  | 5                                           |                    | 3                   |                   |                           |            | 1                      | 1                              |              |              |        | 2                                        | 1           |                       |                      |                                |                                 |                               |                            | 22  |
| unspecified encephalopathy | unspecified secondary CNS affection                                      | 10  | 0                                           |                    |                     |                   |                           |            |                        |                                |              |              |        |                                          |             |                       |                      |                                |                                 |                               |                            | 10  |
| surgical emergency         | aortic dissection/bleeding                                               | 5   | 2                                           |                    |                     |                   |                           | 1          | 1                      |                                |              |              |        |                                          |             |                       |                      |                                |                                 |                               |                            | 6   |
|                            | mesenteric infarction                                                    | 1   | 1                                           |                    |                     |                   |                           |            |                        | 1                              |              |              |        |                                          | 1           |                       |                      |                                |                                 |                               |                            | 1   |
|                            |                                                                          | 854 | 282                                         | 29                 | 69                  | 1                 | 12                        | 109        | 88                     | 5                              | 1            | 1            | 5      | 17                                       | 11          | 37                    | 11                   | 2                              | 1                               | 1                             | 1                          | 1   |
